# Supplementary material for: Quantitative sequencing using BID-seq uncovers abundant pseudouridines in mammalian mRNA at base resolution
Source: PubMed Central journal article supplement (PMC10017504; doi:10.1038/s41587-022-01505-w), 2022-10-27
Supplement: 41587_2022_1505_MOESM1_ESM.pdf [file 41587_2022_1505_MOESM1_ESM.pdf]

# Quantitative sequencing using BID-seq uncovers abundant pseudouridines in mammalian mRNA at base resolution

---

In the format provided by the authors and unedited

---

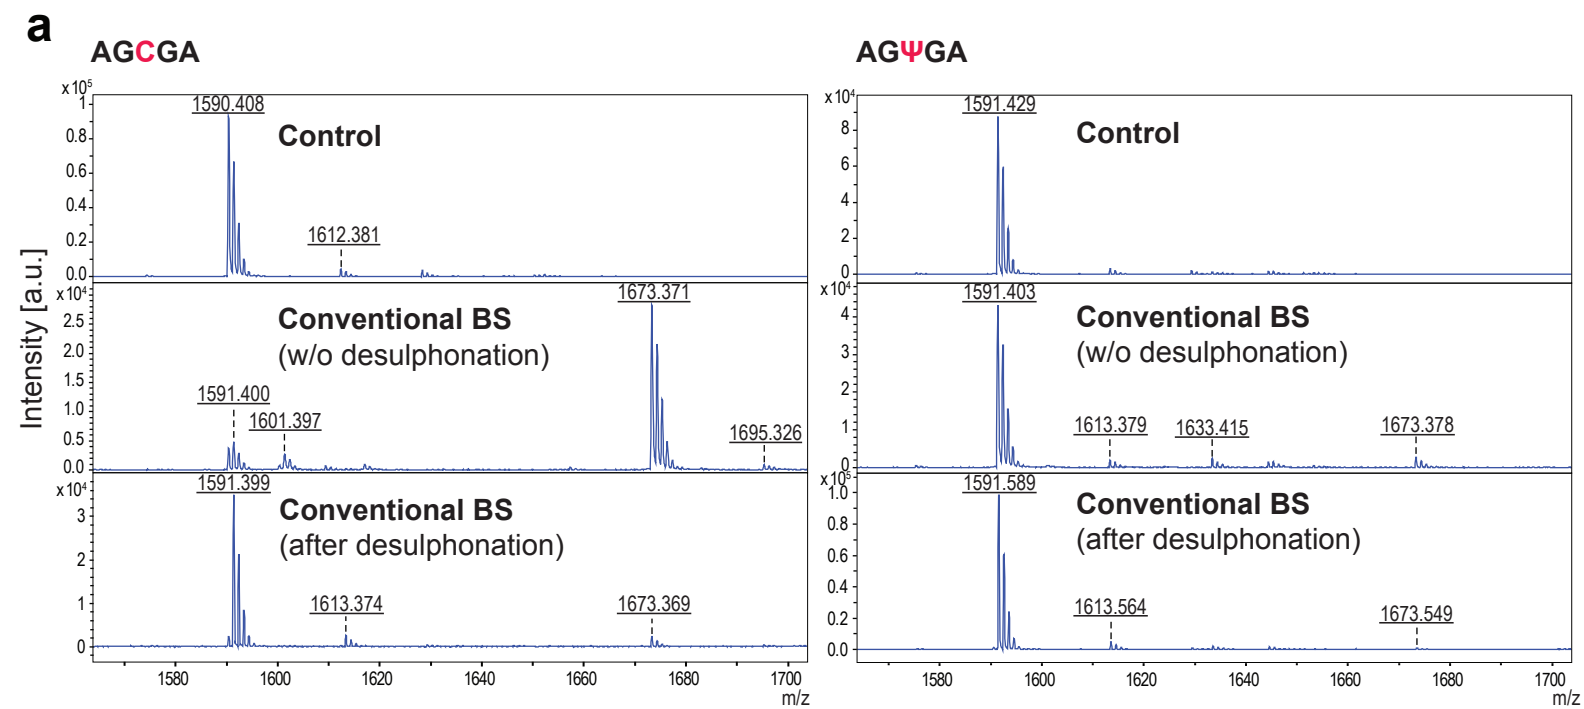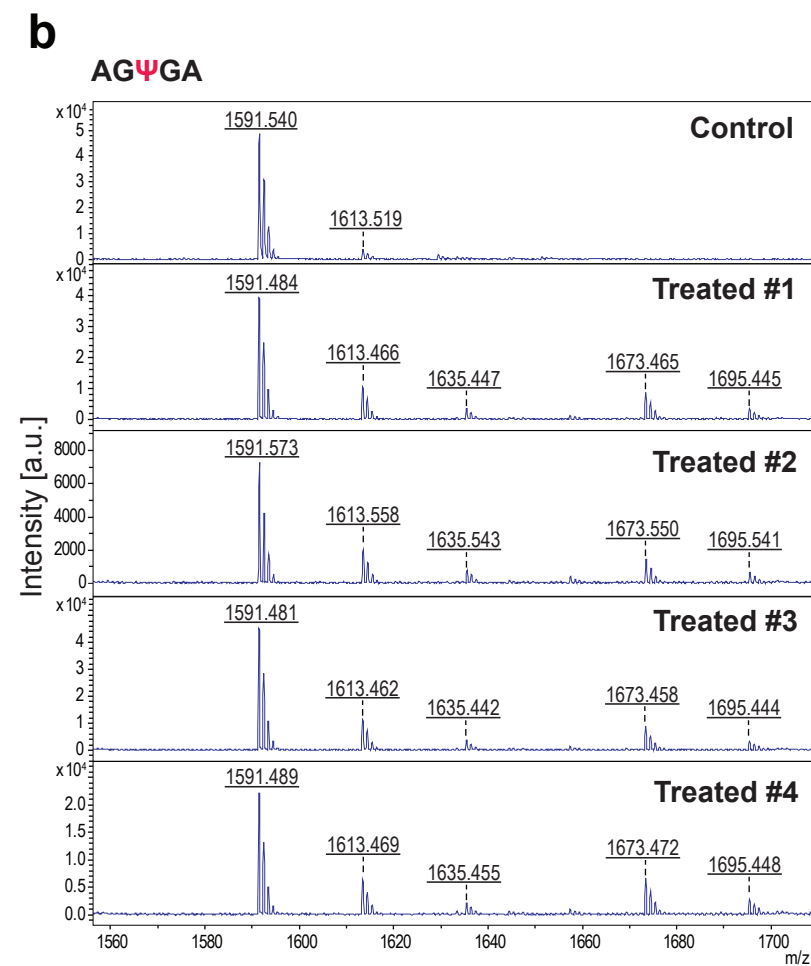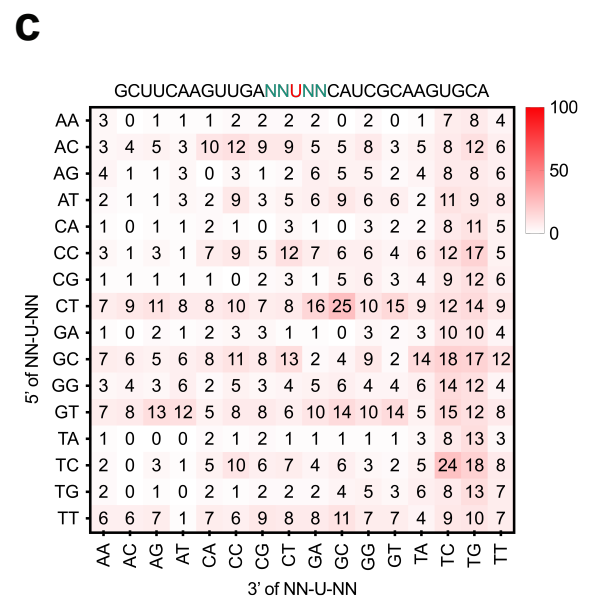

**Supplementary Fig. 1 | BID-seq selectively converts Ψ into the Ψ-BS adduct without affecting C or U in RNA. a**, Conventional bisulfite treatment converts cytosine (C) into uridine (U) but shows very low reactivity with pseudouridine (Ψ). **b**, Bisulfite treatment in RBS-seq converts a small portion of Ψ into the Ψ-BS adduct. **c**, Heatmap plot for deletion ratios on 256 motifs (NNUNN) after the optimized bisulfite treatment in BID-seq.

**a**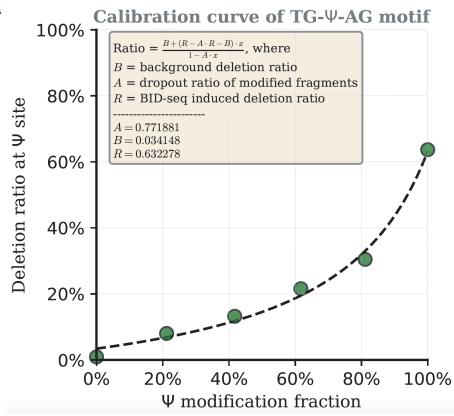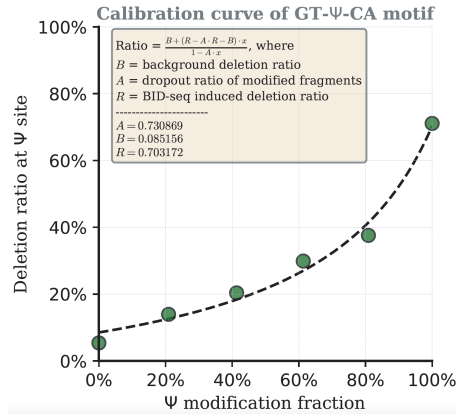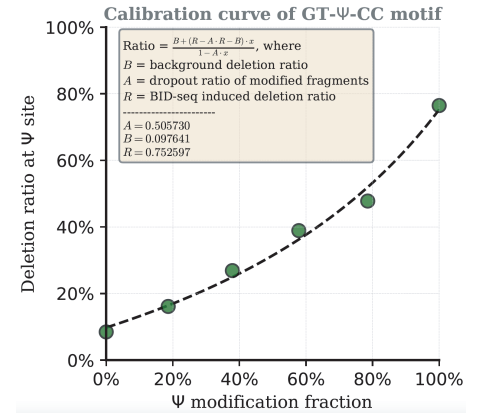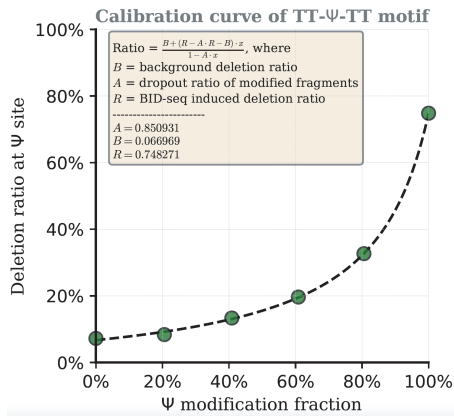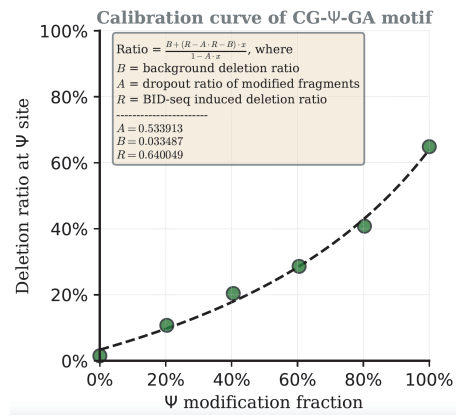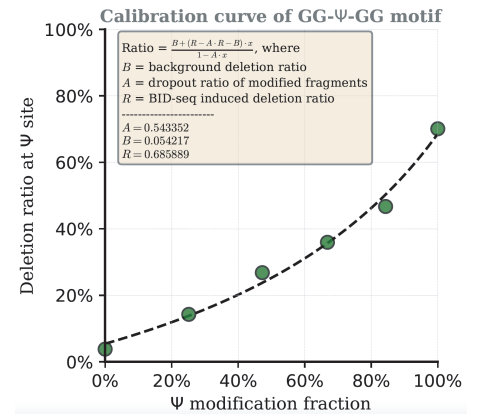**b**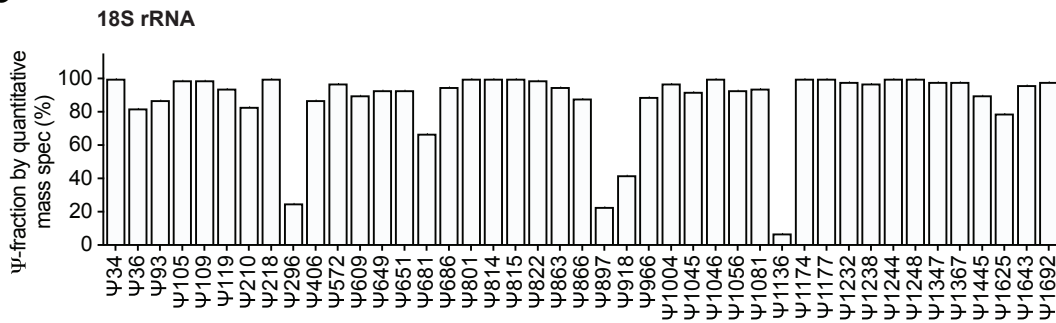**c**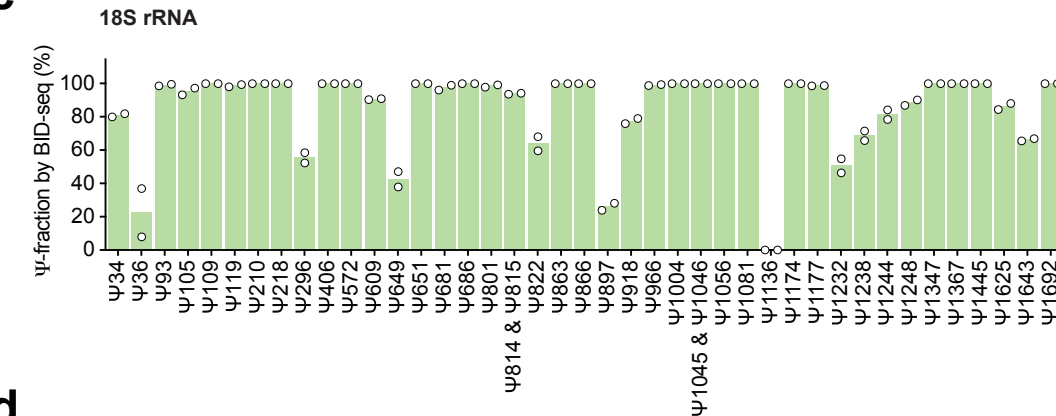**d**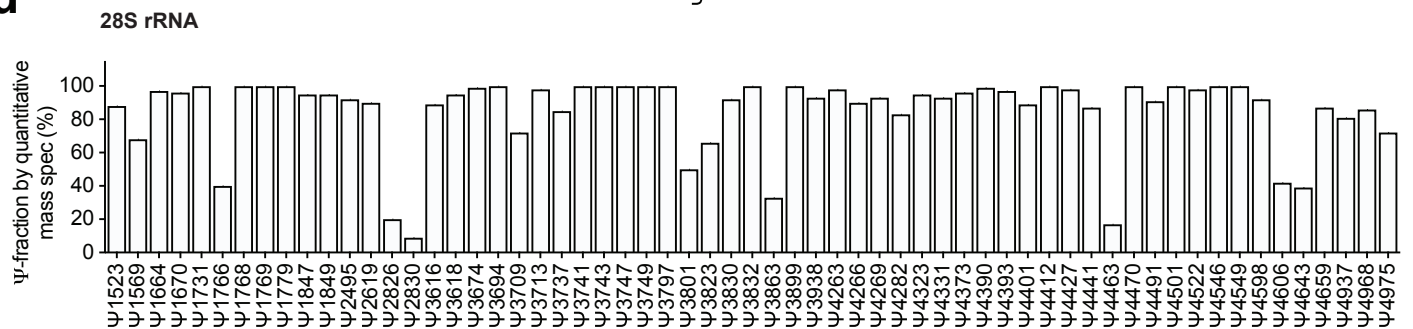

**e**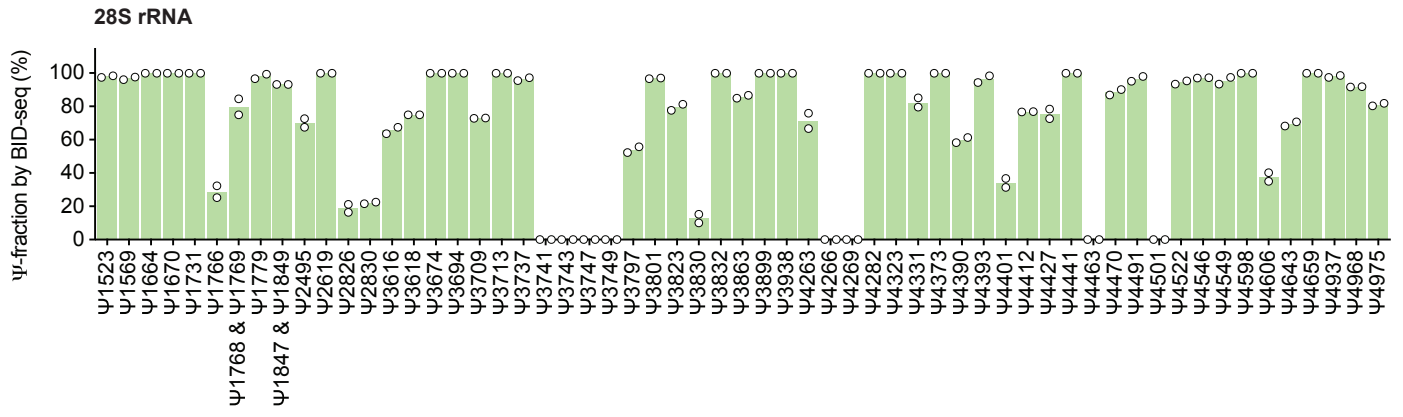**f**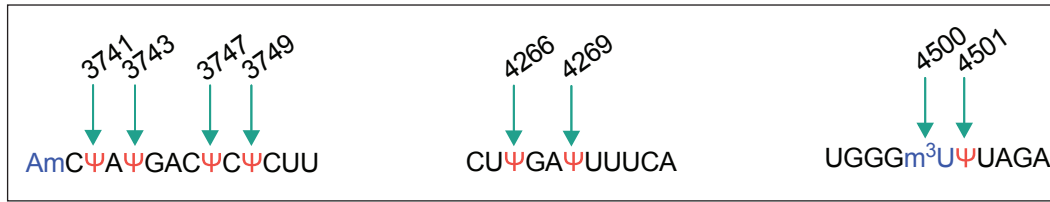**g**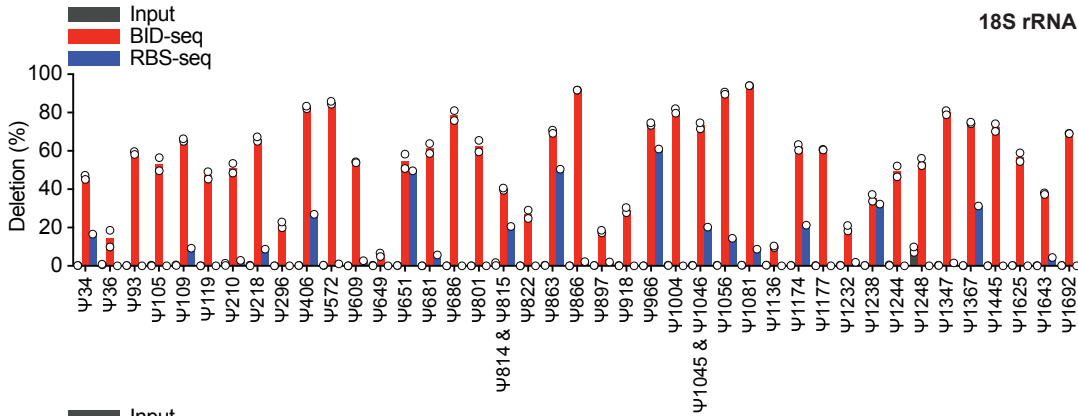**h**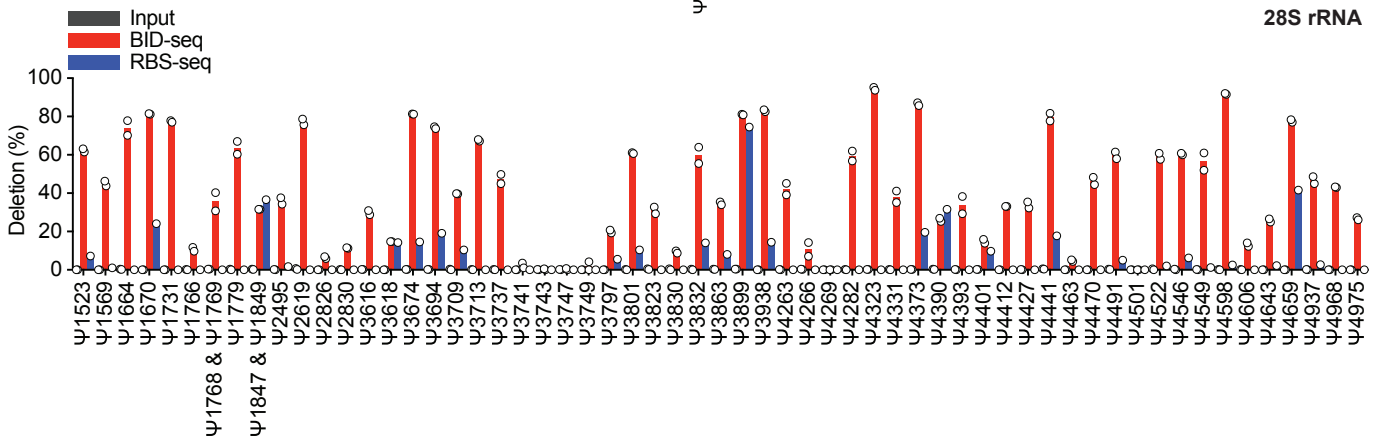**i**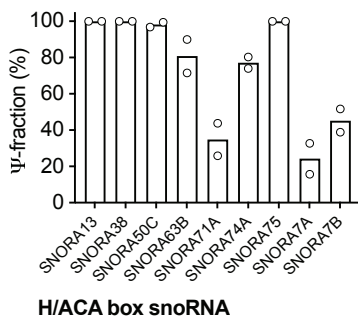**j**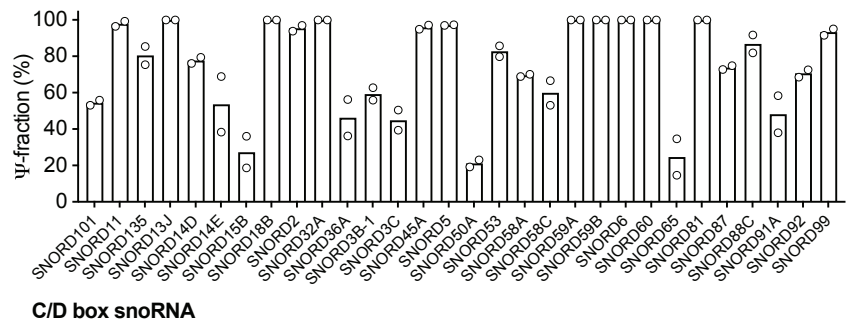

**Supplementary Fig. 2 | BID-seq validated known  $\Psi$  sites in human rRNA.** **a**, Representative sequence-context-dependent calibration curves for  $\Psi$  fraction quantification. **b**, The  $\Psi$  fraction of known  $\Psi$  sites in HeLa 18S rRNA by mass spectrometry. **c**, The  $\Psi$  fraction of known  $\Psi$  sites in HeLa 18S rRNA by BID-seq.  $n = 2$ , biologically independent samples. **d**, The  $\Psi$  fraction of known  $\Psi$  sites in HeLa 28S rRNA by mass spectrometry. **e**, The  $\Psi$  fraction of known  $\Psi$  sites in HeLa 28S rRNA by BID-seq.  $n = 2$ , biologically independent samples. **f**, The surrounding rRNA sequences for 28S rRNA  $\Psi$ 3741/ $\Psi$ 3743/ $\Psi$ 3747/ $\Psi$ 3749, 28S rRNA  $\Psi$ 4266/ $\Psi$ 4269, and 28S rRNA  $\Psi$ 4501. **g**, The deletion ratios of all known  $\Psi$  sites in HeLa 18S rRNA, comparing BID-seq treatment with RBS-seq treatment and the input. **h**, The deletion ratios of all known  $\Psi$  sites in HeLa 28S rRNA, comparing BID-seq treatment with RBS-seq treatment and the input. **i**,  $\Psi$  modification fraction of  $\Psi$  sites detected in H/ACA box snoRNA when applying BID-seq to HeLa small RNAs ( $< 200$  nt). **j**,  $\Psi$  modification fraction of  $\Psi$  sites detected in C/D box snoRNA when applying BID-seq to HeLa small RNAs ( $< 200$  nt). For **g-j**,  $n = 2$ , biologically independent samples.

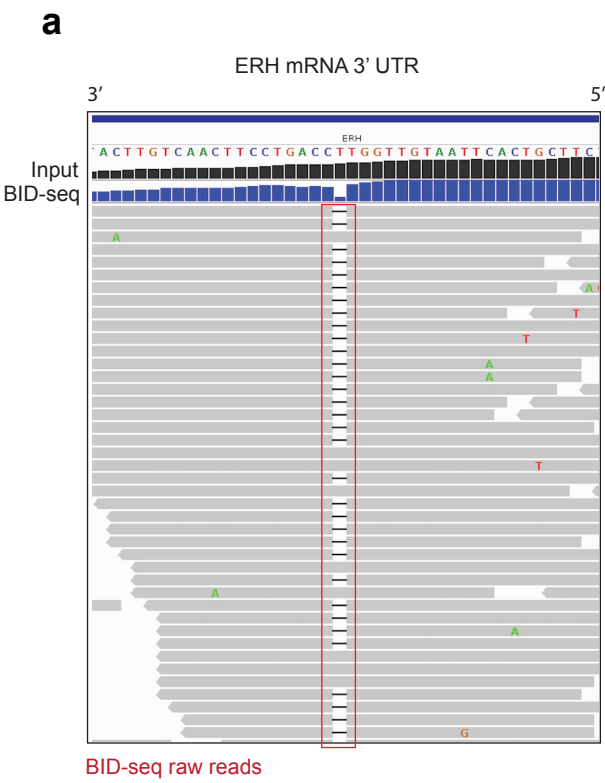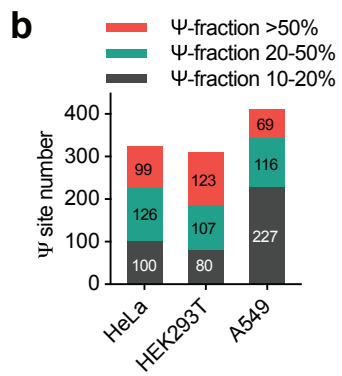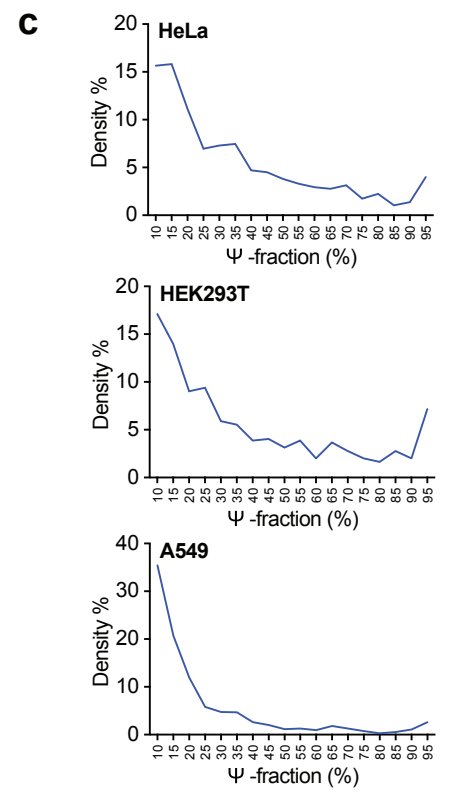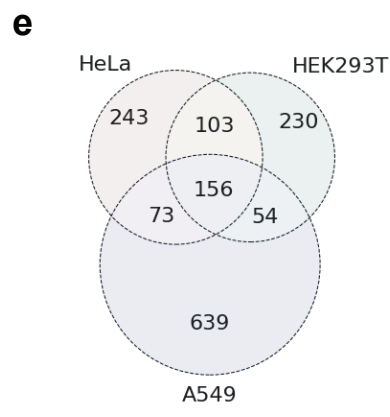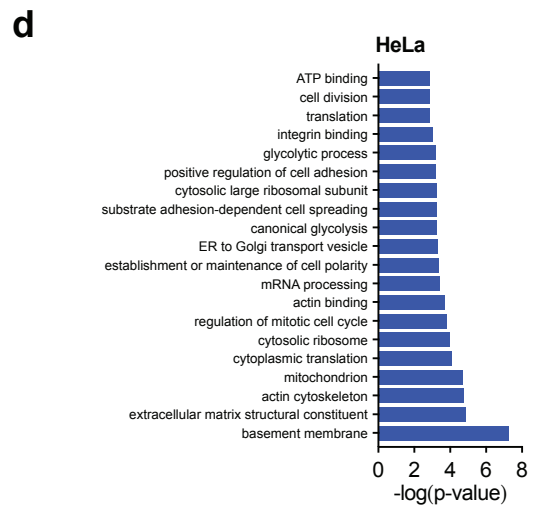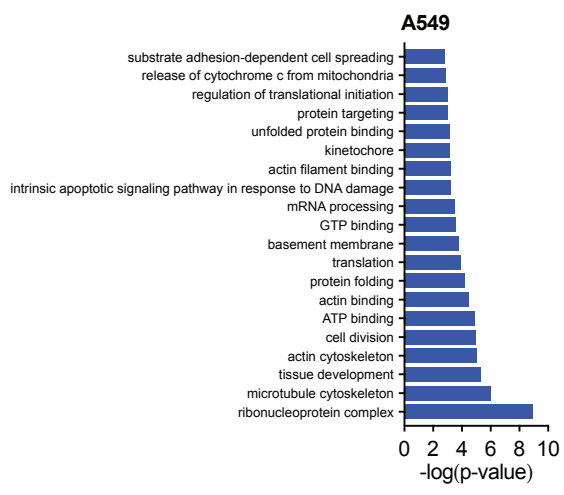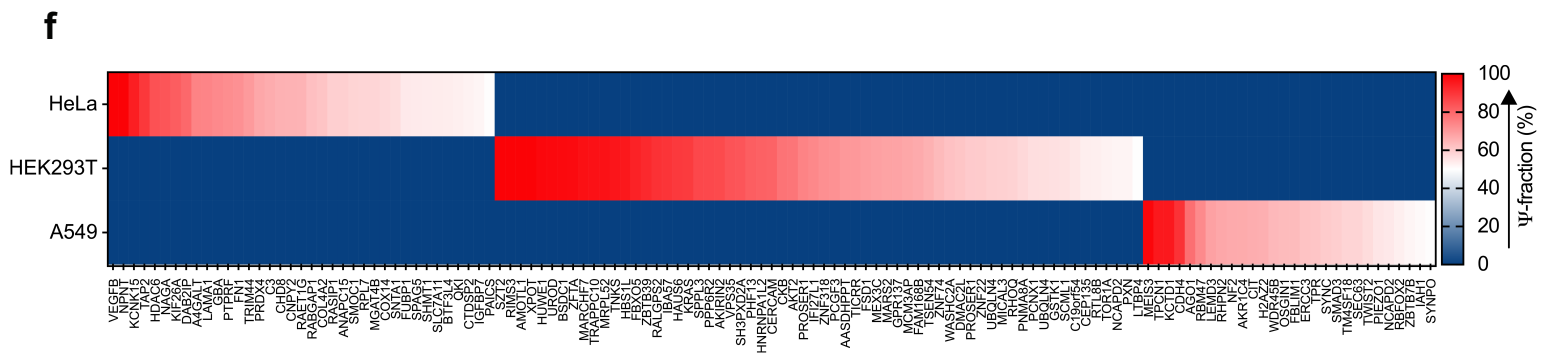

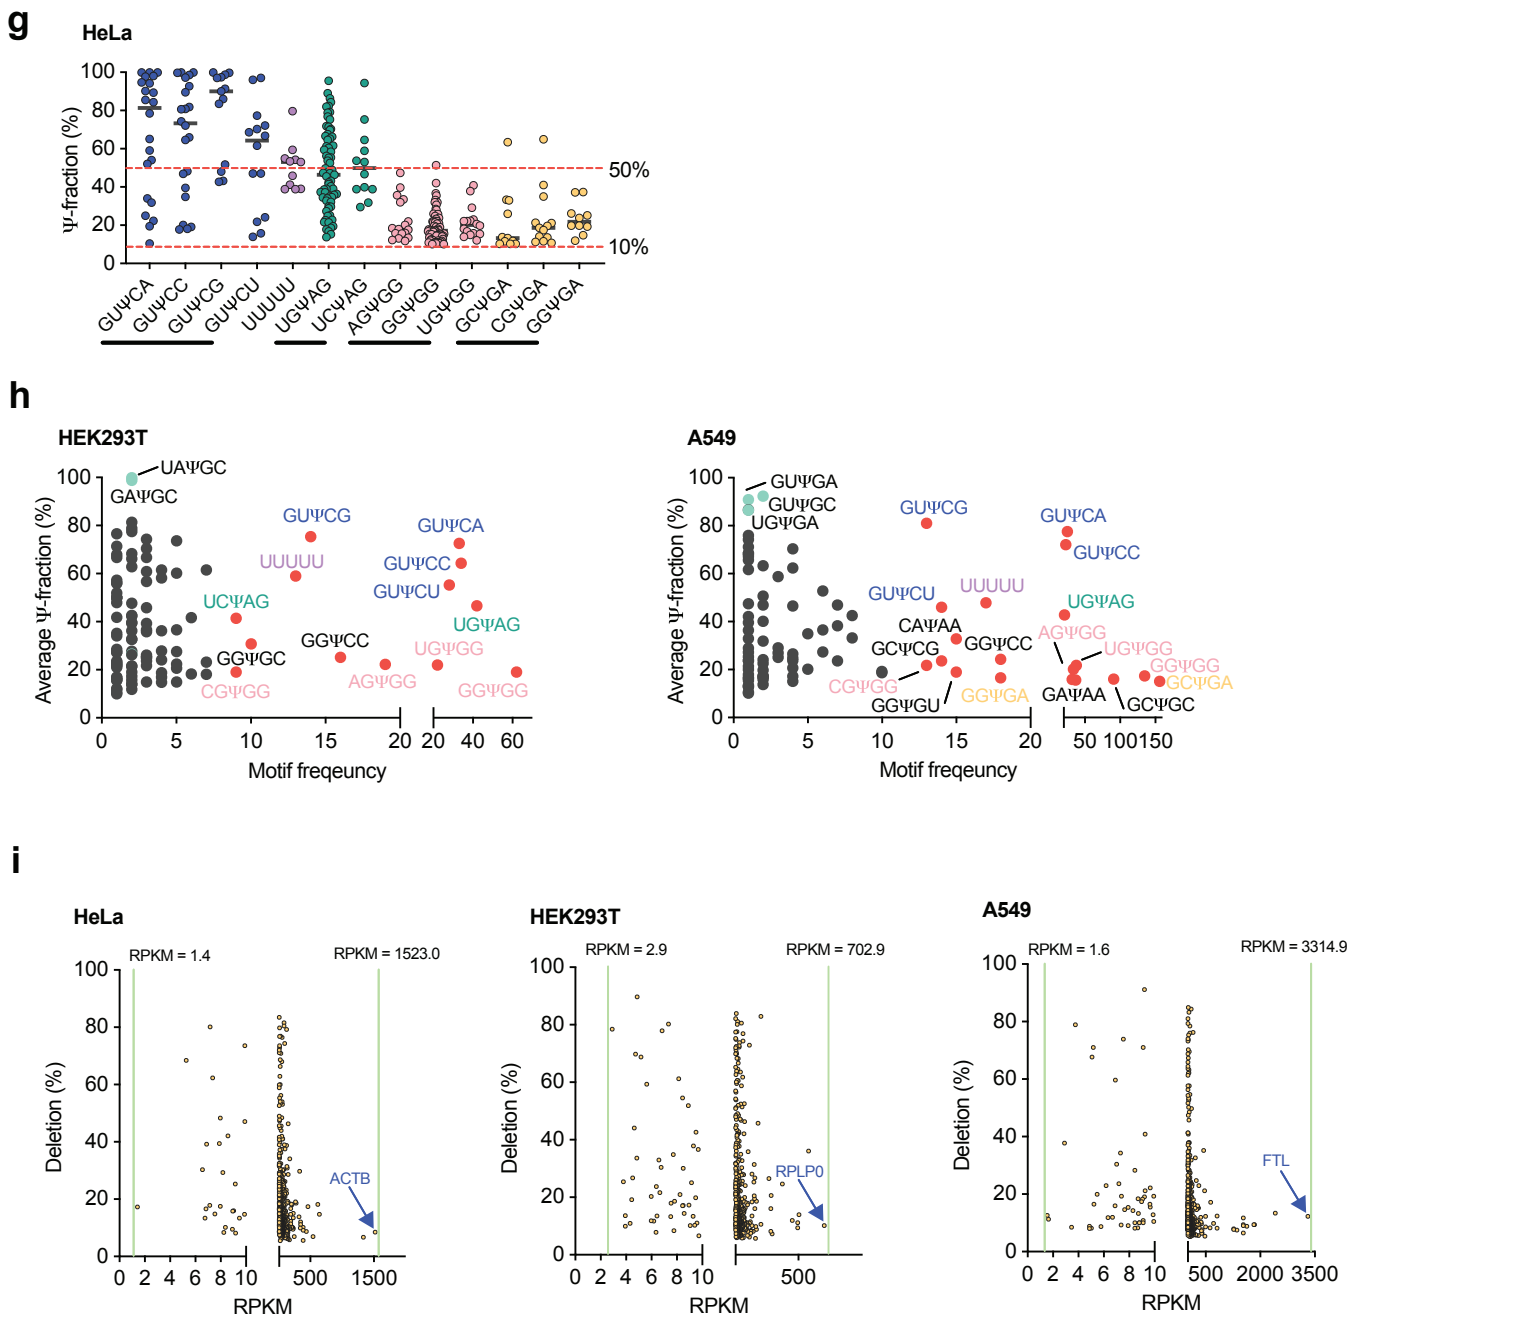

**Supplementary Fig. 3 | BID-seq reveals  $\Psi$  sites in mRNAs of HeLa, HEK293T and A549 cells.** **a**, An example IGV plot to show raw reads coverage at the highly modified  $\Psi$  site within 3' UTR of HeLa ERH mRNA, where all deletion signatures occur at internal positions within the reads. **b**, BID-seq reveals 325, 310, and 412  $\Psi$  sites (modification fraction above 10%, deletion count above 10) in HeLa, HEK293T and A549 cells, respectively. **c**, The mRNA  $\Psi$  site number distribution normalized to  $\Psi$ -fraction bins, in three human cell lines. **d**, Top 20 enriched GO clusters from  $\Psi$ -modified genes carrying mRNA  $\Psi$ , in HeLa and A549 cells, respectively. One-sided Fisher's Exact test. Adjusted p-values using the linear step-up method. **e**, The pie chart to show overlapped  $\Psi$  sites above 10%  $\Psi$ -fraction in three cell lines. **f**, The heatmap plot of 127 cell-line-specific highly modified  $\Psi$  sites (above 50%  $\Psi$ -fraction) in the corresponding gene name versus each cell line. **g**, The modification level distribution of several most frequent  $\Psi$  motif contexts on HeLa mRNA.  $n = 22, 22, 13, 14, 11, 69, 12, 17, 61, 16, 11, 13$  and 10 independent  $\Psi$  sites within GU $\Psi$ CA, GU $\Psi$ CC, GU $\Psi$ CG, GU $\Psi$ CU, UUUUU, UG $\Psi$ AG, UC $\Psi$ AG, AG $\Psi$ GG, GG $\Psi$ GG, UG $\Psi$ GG, GC $\Psi$ GA, CG $\Psi$ GA and GG $\Psi$ GA motifs, respectively. **h**, Distribution of motifs for 543 and 922  $\Psi$  sites in HEK293T and A549 mRNA, respectively, with "X axis" as the motif frequency and "Y axis" showing the average  $\Psi$  modification fraction of each motif. **i**, The correlation of deletion ratio at each  $\Psi$  site versus RPKM value of the corresponding mRNA, in HeLa, HEK293T and A549 cells, respectively.

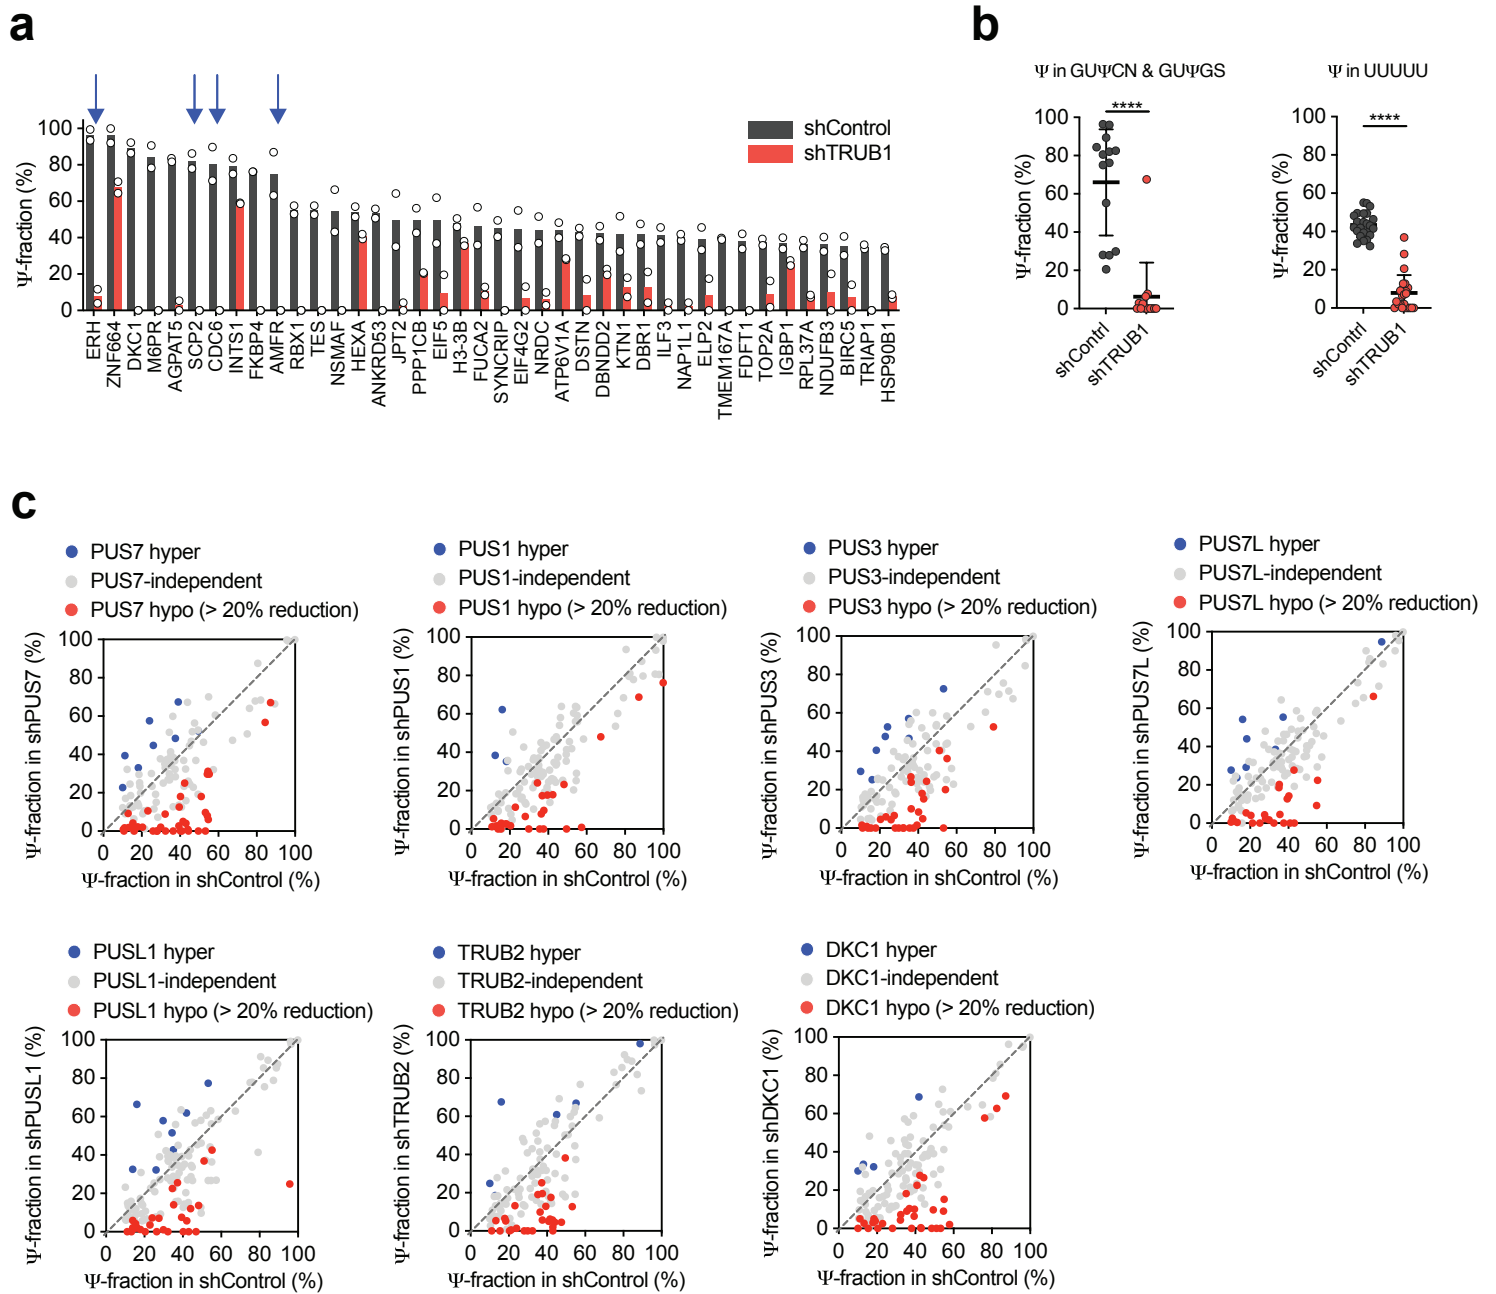

**Supplementary Fig. 4 | BID-seq assigns ‘writer’ proteins for mRNA  $\Psi$  sites.** **a**, The modification fraction of top 40 TRUB1-installed  $\Psi$  sites in HeLa mRNA, in shTRUB1 versus shControl. ERH, SCP2, AMFR and CDC6 are marked by blue arrows.  $n = 2$ , biologically independent samples. **b**, TRUB1-installed  $\Psi$  sites mostly appear within the GU $\Psi$ CN, GU $\Psi$ GS (S = C or G) and poly-U (UUUUU) motifs, in HeLa mRNA. Left:  $n = 14$  independent  $\Psi$  sites within GU $\Psi$ CN and GU $\Psi$ GS motifs (N = A or C or G or U; S = G or C); \*\*\*\* $P < 0.0001$ ; paired, two-tailed t-test. Right:  $n = 24$  independent  $\Psi$  sites within UUUUU motif; \*\*\*\* $P < 0.0001$ ; paired, two-tailed t-test. Data are presented as mean values  $\pm$  s.d. **c**, Among 133  $\Psi$  sites (above 10%  $\Psi$ -fraction) in shControl HeLa mRNA, scatter plot of BID-seq data showing the reduced  $\Psi$ -fraction at 40, 28, 30, 24, 28, 28, and 33  $\Psi$  sites in PUS1-, PUS7-, PUS3-, PUS7L-, PUSL1-, TRUB2-, and DKC1-depleted cells, respectively.



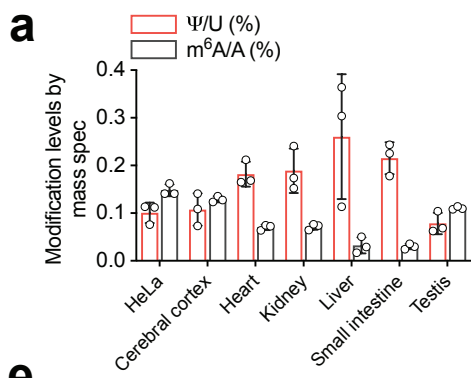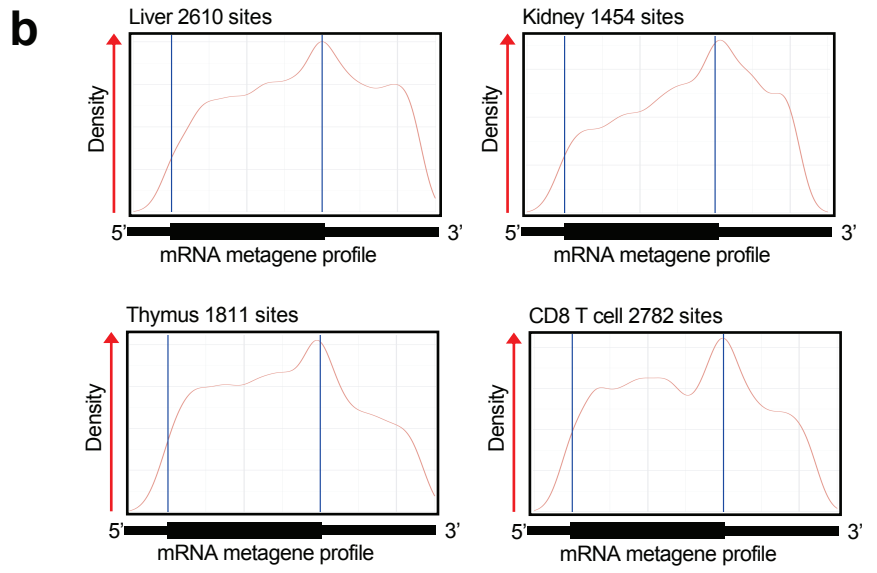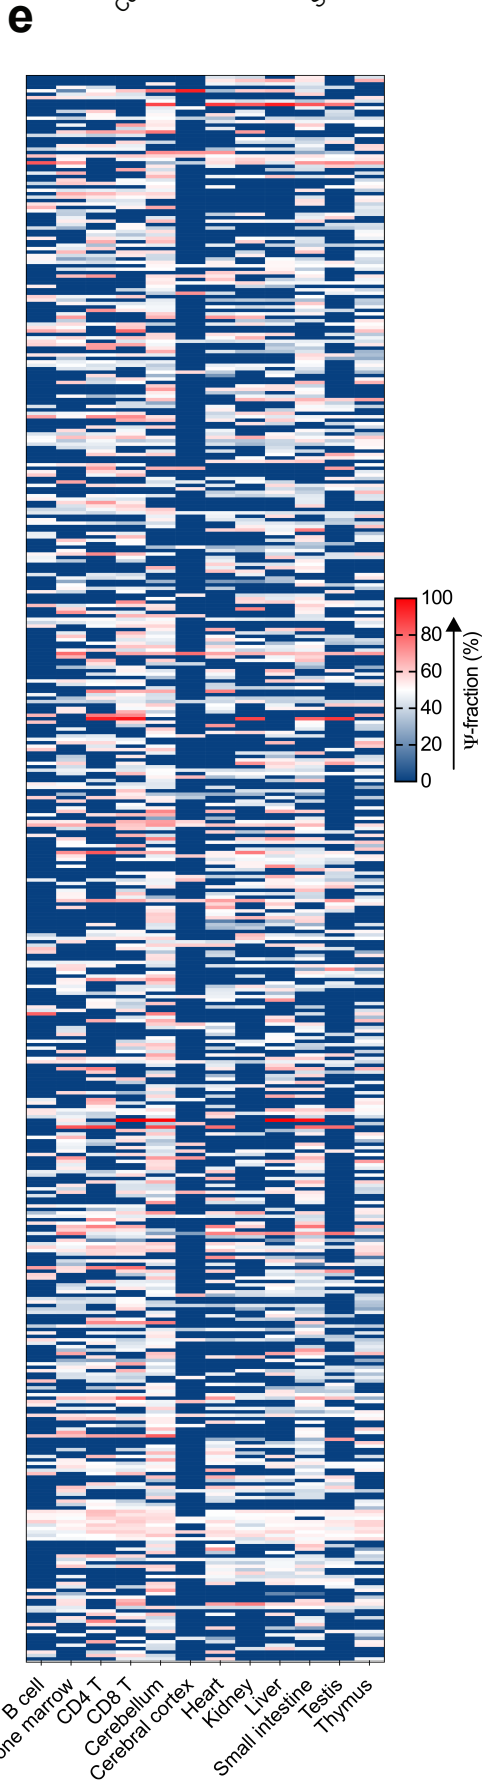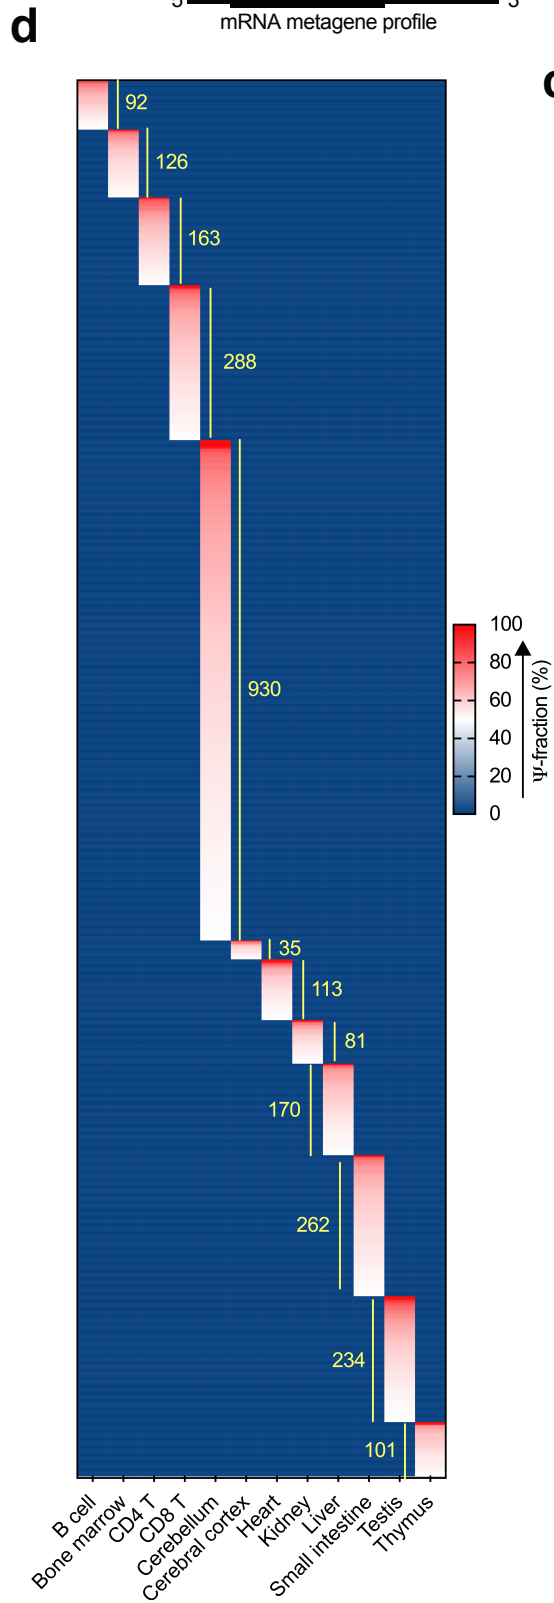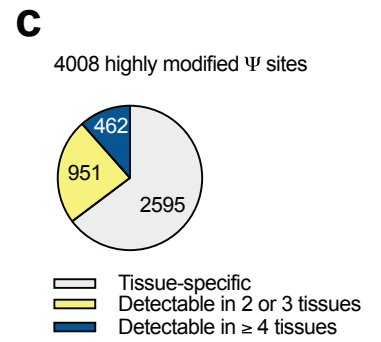

**Supplementary Fig. 5 | BID-seq detects hundreds to thousands of highly modified  $\Psi$  sites in mRNA from multiple mouse tissues.** **a**, The modification level (by LC-MS/MS) of  $\Psi$ /U and m6A/A in mRNA isolated from mouse cerebral cortex, heart, kidney, liver, small intestine and testis, respectively, compared with that in HeLa cells.  $n = 3$ , biologically independent samples; data are presented as mean values  $\pm$  s.d. **b**, The metagene plot of 2,610, 1,454, 1,811 and 2,782  $\Psi$  sites (modification fraction above 10%) in mRNA from mouse liver, kidney, thymus and CD8 T cell, respectively. **c**, Pie chart showing the site number distribution for 4,008 highly modified  $\Psi$  sites (above 50%  $\Psi$  fraction) from mouse tissue mRNA, as tissue-specific highly modified  $\Psi$ , highly modified  $\Psi$  in at least 1 tissue & detectable (above 10%  $\Psi$  fraction) in 2 or 3 tissues, and highly modified  $\Psi$  in at least 1 tissue & detectable (above 10%  $\Psi$  fraction) in above 4 tissues. **d**, The heatmap plot of  $\Psi$ -fraction for 2,595 tissue-specific highly modified  $\Psi$  sites, in a matrix of the corresponding gene name versus each tissue type. **e**, The heatmap plot of  $\Psi$ -fraction for 462 highly modified  $\Psi$  sites showing above 50%  $\Psi$ -fraction in at least 1 tissue and detectable (above 10%  $\Psi$  fraction) in above 4 tissues, in a matrix of the corresponding gene name versus each tissue type.

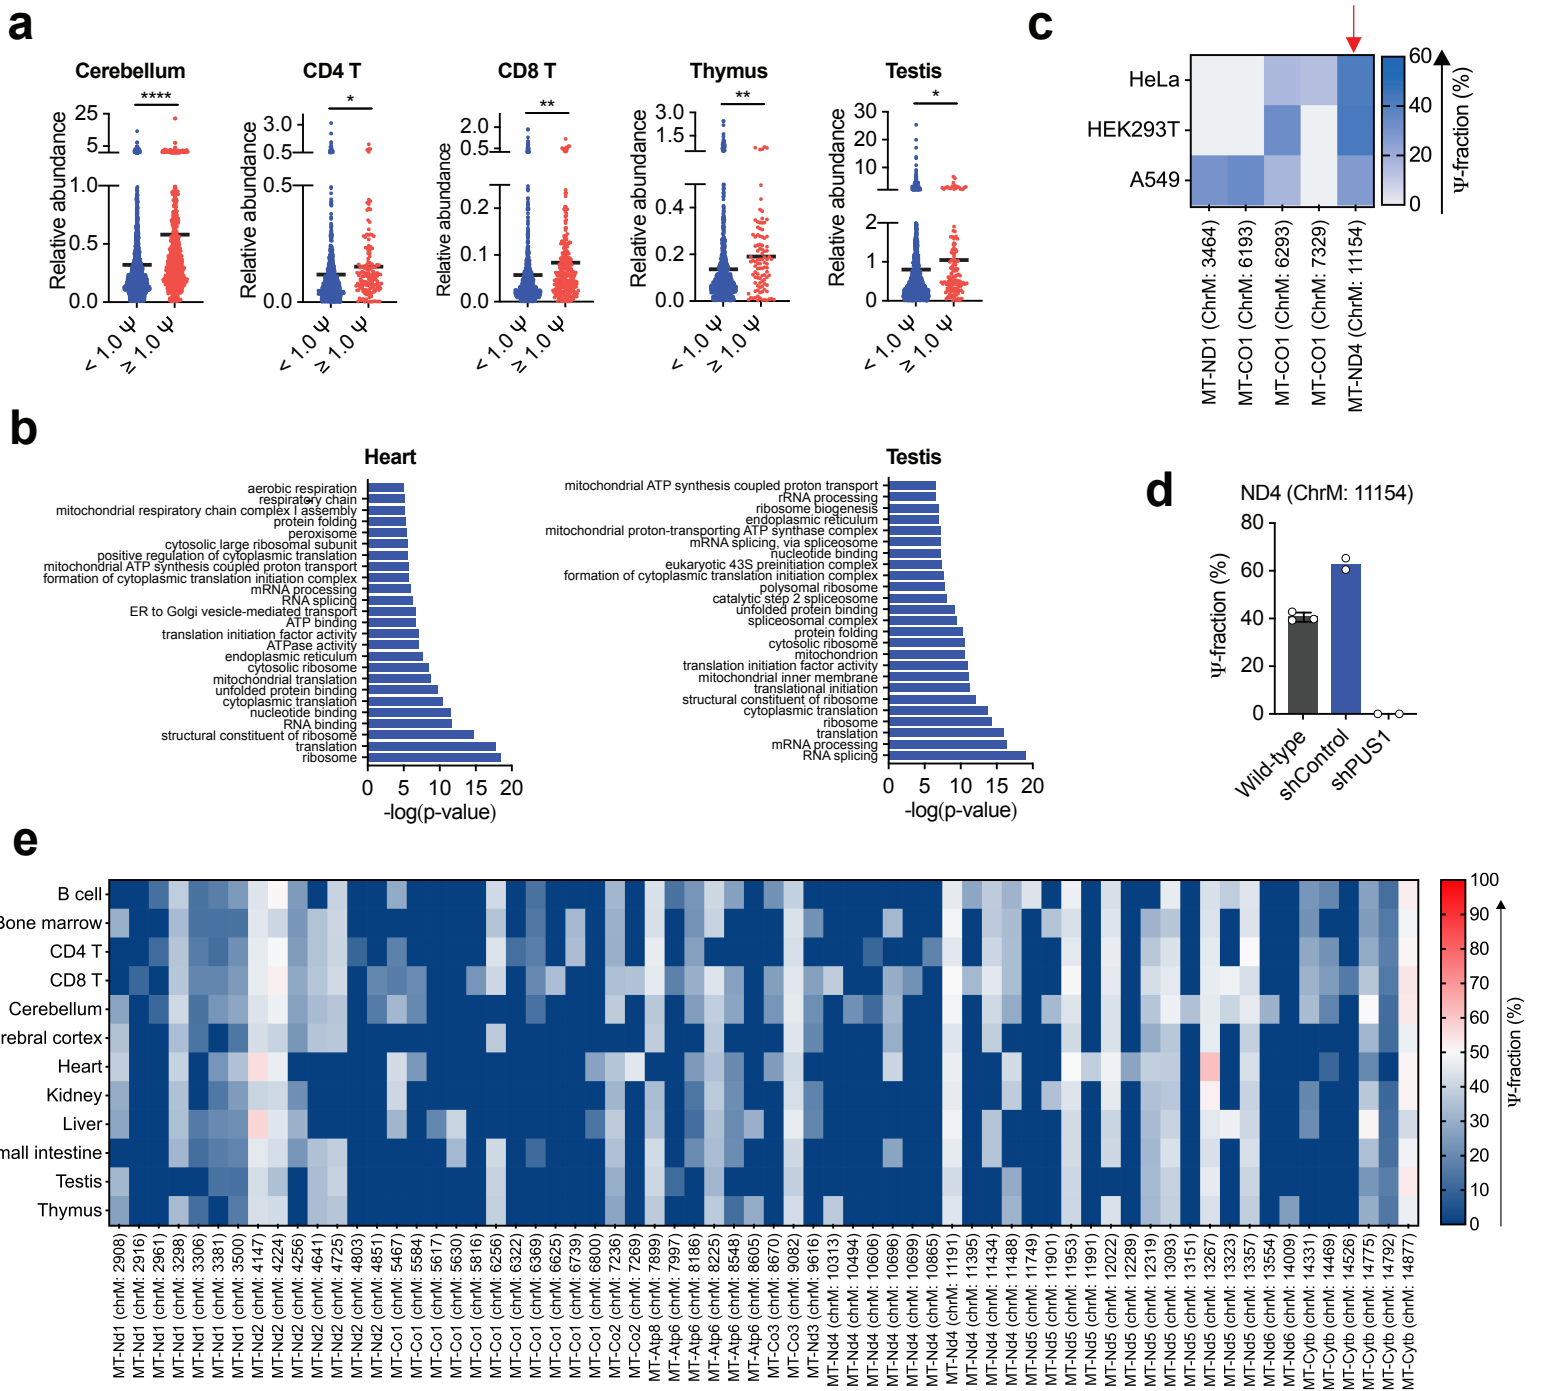

**Supplementary Fig. 6 | mRNA  $\Psi$  affects mRNA abundance in multiple mouse tissues.** **a**, The normalized mRNA abundance of  $\Psi$  moderate-strength genes ( $< 1.0$ ) vs.  $\Psi$  high-strength genes (above 1.0) in mouse cerebellum, CD4 T cells, CD8 T cells, thymus and testis. The  $\Psi$ -strength of each gene was defined as the sum of  $\Psi$  fraction at all the  $\Psi$  sites within one gene.  $n = 1,997$   $\Psi$ -moderate-strength genes and  $n = 746$   $\Psi$ -high-strength genes, in cerebellum;  $n = 843$   $\Psi$ -moderate-strength genes and  $n = 149$   $\Psi$ -high-strength, in CD4 T cells;  $n = 1,022$   $\Psi$ -moderate-strength genes and  $n = 273$   $\Psi$ -high-strength genes, in CD8 T cells;  $n = 1,018$   $\Psi$ -moderate-strength genes and  $n = 98$   $\Psi$ -high-strength genes, in thymus;  $n = 1,356$   $\Psi$ -moderate-strength genes and  $n = 124$   $\Psi$ -high-strength genes, in testis.  $P = < 0.0001, 0.0279, 0.0012, 0.0026, 0.0313$ , respectively, in five mouse tissues; unpaired, two-tailed t-test;  $*P < 0.05$ ;  $**P < 0.01$ ;  $***P < 0.001$ ; and  $****P < 0.0001$ . **b**, Top 25 enriched GO clusters from non-tissue-specific  $\Psi$ -modified genes, in mouse heart and testis, respectively. One-sided Fisher's Exact test. Adjusted p-values using the linear step-up method. **c**, The heatmap plot of  $\Psi$  fraction for  $\Psi$  sites within mitochondria-encoded mRNA in 3 human cell lines, in a matrix of  $\Psi$  site location versus each cell line. **d**, The  $\Psi$  modification fraction of mt-ND4 mRNA  $\Psi$  site in wild-type HeLa cells, shControl HeLa cells and PUS1-depleted HeLa cells, respectively. For wild-type HeLa cells,  $n = 3$ , biologically independent samples; data are presented as mean values  $\pm$  s.d. For shControl and PUS1-depleted HeLa cells,  $n = 2$ , biologically independent samples. **e**, The heatmap plot of  $\Psi$ -fraction for 66  $\Psi$  sites within mitochondrial mRNA in mouse tissues, in a matrix of  $\Psi$  site location versus tissue type.

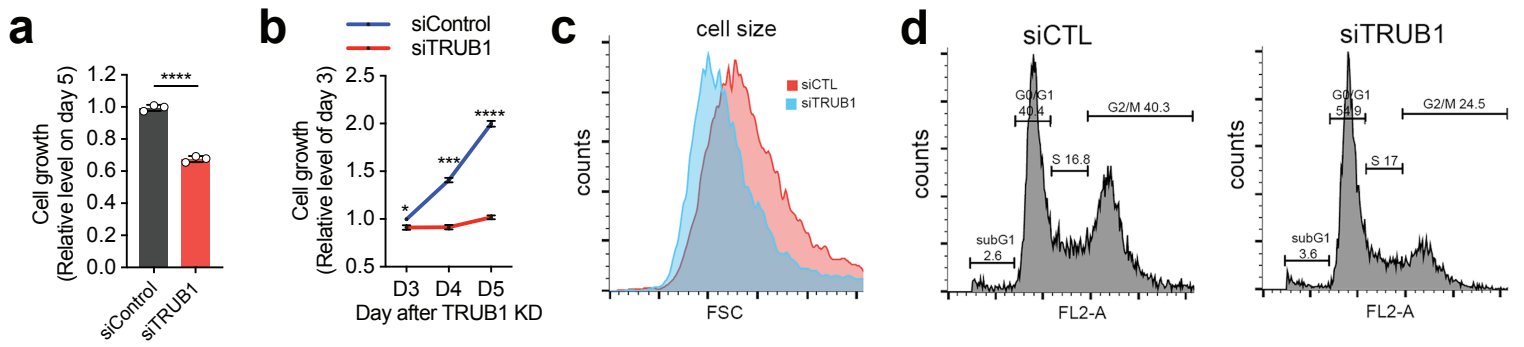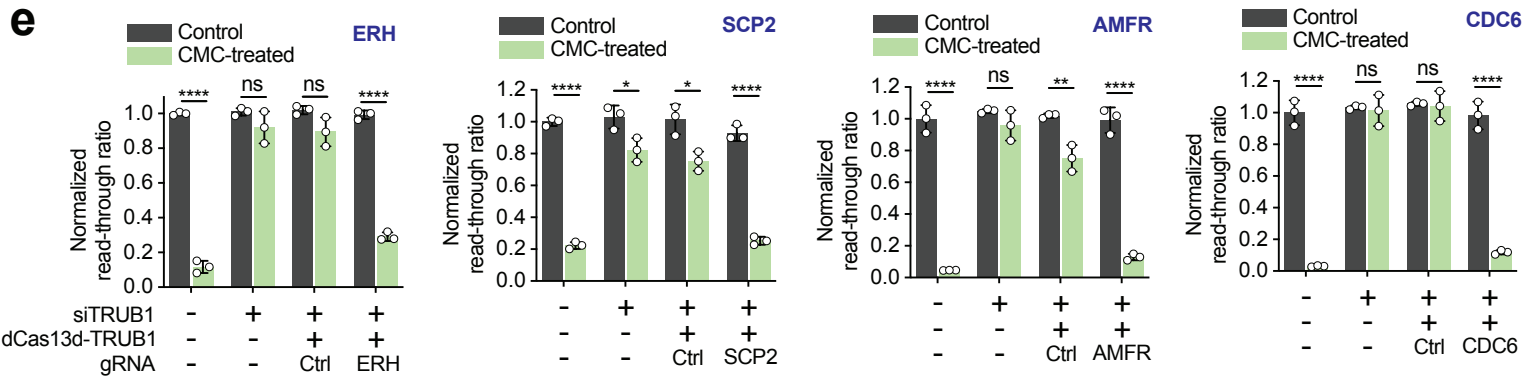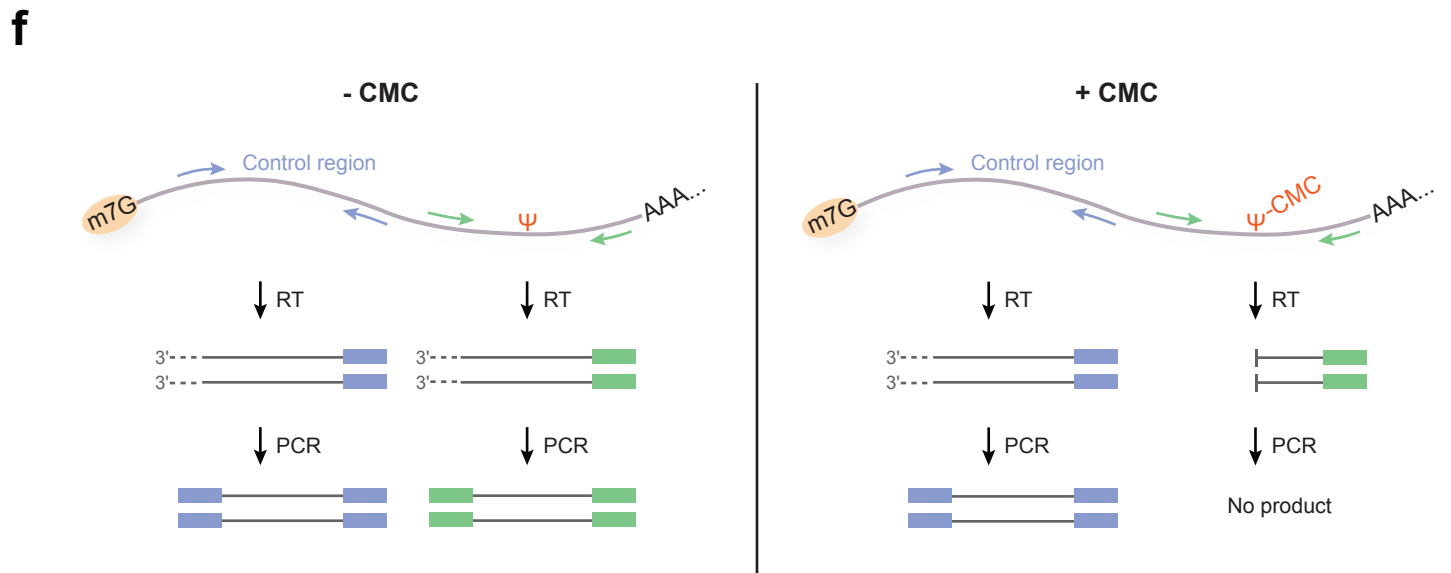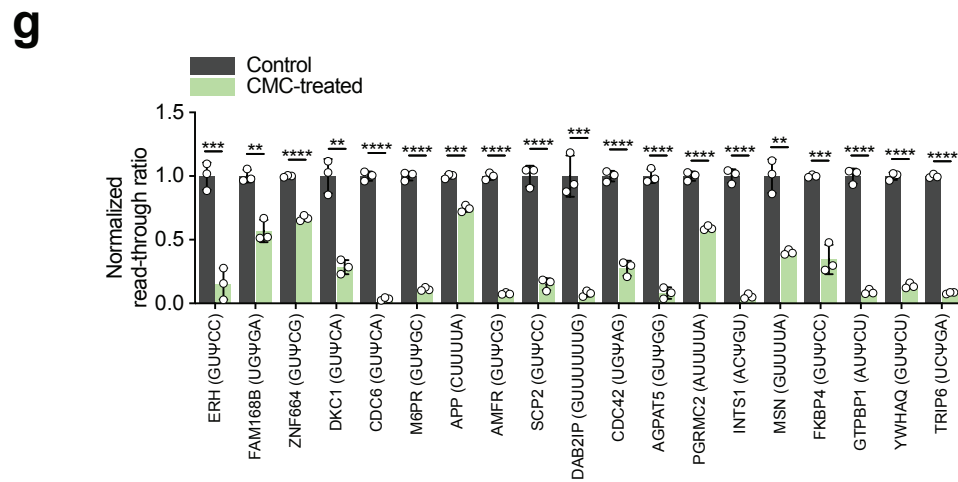

**h**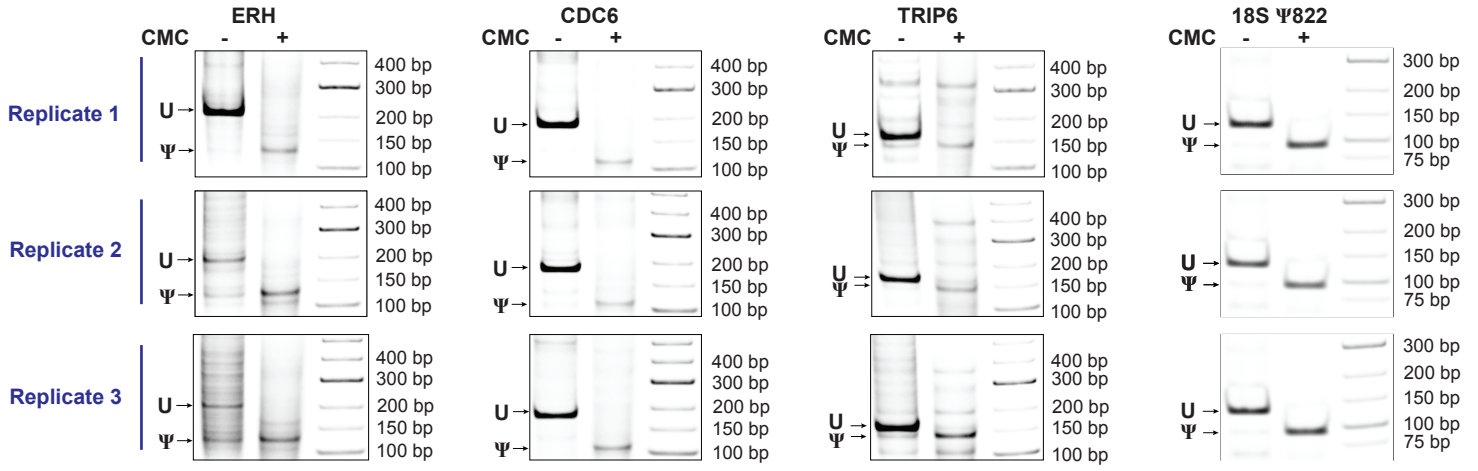**i**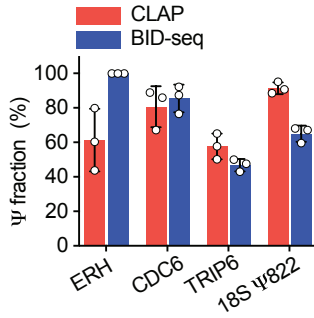**j**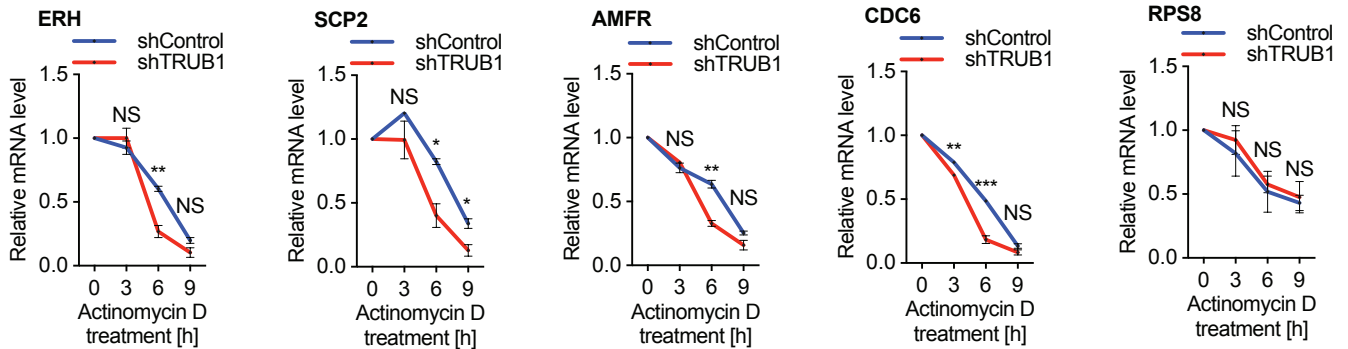

**Supplementary Fig. 7 | TRUB1 depletion impacts cell growth and affects mRNA stability.** **a**, TRUB1 depletion inhibit cell growth. Growth of HeLa cells was measured by SRB assay on day 5 after transfection with corresponding siRNA. \*\*\*\* $P < 0.0001$ ; unpaired, two-tailed t-test. **b**, TRUB1 depletion inhibits cell growth. Cell growth of HeLa cells transfected with siRNA was measured by SRB assay from Day 3 to Day 5.  $P = 0.0368, 0.0001, <0.0001$ , respectively, for the three time points; unpaired, two-tailed t-test. **c**, TRUB1 depletion decreases cell size, compared with siControl. **d**, TRUB1 depletion leads to G1 phase arrest, after 72-hour siRNA knockdown. **e**, Validation of mRNA Ψ site by CMC-assisted RT-qPCR assays, in siTRUB1 versus siControl. Then the restoration of Ψ was performed by dCas13d-TRUB1 delivery. The normalized read-through ratios were measured in untreated and CMC-treated samples by designed RT-qPCR primers. For ERH,  $P = <0.0001, 0.1748, 0.0663, <0.0001$ , respectively; For SCP2,  $P = <0.0001, 0.0264, 0.0148, <0.0001$ , respectively; For AMFR,  $P = <0.0001, 0.1776, 0.0054, <0.0001$ , respectively; For CDC6,  $P = <0.0001, 0.7442, 0.8054, <0.0001$ , respectively; unpaired, two-tailed t-test. **f**, A flowchart of CMC-based RT-qPCR assay to quantify read-through ratios (the CMC-modified Ψ blocks RT and the following qPCR amplification). **g**, CMC-based RT-qPCR assay verified an array of Ψ sites within different sequence motifs. For the 19 Ψ sites,  $P = 0.0009, 0.0017, <0.0001, 0.0011, <0.0001, <0.0001, 0.0002, <0.0001, <0.0001, 0.0006, <0.0001, <0.0001, <0.0001, 0.0014, 0.0006, <0.0001, <0.0001, <0.0001$ , respectively; unpaired, two-tailed t-test. **h**, Ψ site validation through “CMC-RT and Ligation Assisted PCR analysis of Ψ modification” (CLAP). CLAP assay identified four Ψ sites in ERH, CDC6, TRIP6, and 18S rRNA Ψ822, respectively, as bands of expected sizes on gel images. **i**, The estimated Ψ stoichiometry for four Ψ sites in ERH, CDC6, TRIP6, and 18S rRNA Ψ822, respectively, by CLAP assay versus BID-seq. **j**, RT-qPCR assays validating the decreased mRNA half-life when silencing TRUB1 in HeLa cells, for TRUB1-targets carrying a highly modified Ψ site in mRNA of ERH, SCP2, AMFR, and CDC6, compared with RPS8 as the non-target (without detectable Ψ in its mRNA). For ERH,  $P = 0.4689, 0.0032, 0.0941$ , respectively; For SCP2,  $P = 0.2284, 0.0117, 0.0233$ , respectively; For AMFR,  $P = 0.3334, 0.0012, 0.0825$ , respectively; For CDC6,  $P = 0.0049, 0.0006, 0.1418$ , respectively; For RPS8,  $P = 0.6453, 0.7616, 0.7601$ , respectively; unpaired, two-tailed t-test. For **a, b, e, g, i, and j**,  $n = 3$ , biologically independent samples; data are presented as mean values  $\pm$  s.d.; NS,  $P \geq 0.05$ ; \* $P < 0.05$ ; \*\* $P < 0.01$ ; \*\*\* $P < 0.001$ ; and \*\*\*\* $P < 0.0001$ .

**a**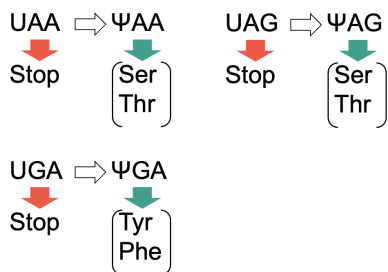**b****NDUFS2 readthrough (HeLa)**

MAALRALCGFRGVAAGVLRPGAGVRLPIQPSRGVRRQWQPDVEVAQQFGGAVMYPKETAHWKPPVNDVDPK  
 DTIVKNITLNFPGQHPAAHGVLRLVMEISGEMVRKCDPHIGLLHRGTEKLIKYTLQALPYFDRLDYSMMMCNEQAYS  
 LAVEKLLNIRPPRAQWIRVLFGEITRLNHNIMAVTTHALDLGAMTPFFWLFEEERKMFERYVSGARMHAAYIRPGG  
 VHQDLPLGLMDDIYQFSKNSFLRLELELLTNNRIWRNRDIDIGVVTAEALNYGFSVMLRSGIQWDLRKTQPYDV  
 YDQVEFDVPVSGRGDCYDRYLRCRVEEMRQSLRIIAQCLNKMPPGEIKVDDAKVSPKRAEMKTSMESLIHFKLYTEGY  
 QVPPGATYTAIEAPKGEFGVYLVSDGSSRPYRCKIKAPGFAHLAGLDMKSKGMLADVVVAIGTQDIVFGEVDRYAGEQ  
 RLIPPAYQLLWSLFTGNWPLCVCVCVCSCTLGCAAFCACTKKGEEIIN

91 exclusive unique peptides, 145 exclusive unique spectra, 166 total spectra, 438/522 amino acids (84% coverage)

|            |            |             |             |             |
|------------|------------|-------------|-------------|-------------|
| MAALRALCGF | RGVAAQVLRP | GAGVRLPIQP  | SRGVRRQWQPD | VEVAQQFGGA  |
| VMYPSKETAH | WKPPPWNVDV | PPKDTIVKNI  | TLNFGPQHPA  | AHGVLRLVME  |
| LSGEMVRKCD | PHIGLLHRGT | EKLIYEKTYL  | QALPYFDRLD  | YVSMCNEQAY  |
| YSLAVEKLLN | IRPPRAQWI  | RVLFGIEITRL | LNHIMAVTTH  | ALDLGAMTPF  |
| FWLFEEREKM | FEFYERVSGA | RMHAAYIRPG  | GVHQDLPLGL  | MDDIYQFSKN  |
| FSLRLDELEE | LLTNNRIWRN | RTIDIGVVTAE | ALNYGFSVML  | RSGIQWDLRKT |
| DLRKTQPYDV | YDQVEFDVPV | GSRGDCYDRY  | LRCRVEEMRQS | LRITIAQCLNK |
| MPPGEIKVDD | AKVSPPKRAE | MKTSMESLIH  | HFKLYTEGYQ  | VPPGATYTAIE |
| EAPKGEFGVY | LVSDGSSRPY | RCKIKAPGFA  | HLAGLDMKSK  | GHMLADVVVAI |
| IGTQDIVFGE | VDRYAGEQRL | IPPAYQLLLW  | SLFLTGNWPL  | CVCVCVCSCTL |
| CSCTLGCAAF | CACTKKGEEI | IN          |             |             |

**c****NDUFS2 readthrough peptide: VFGEVDRYAGEQR**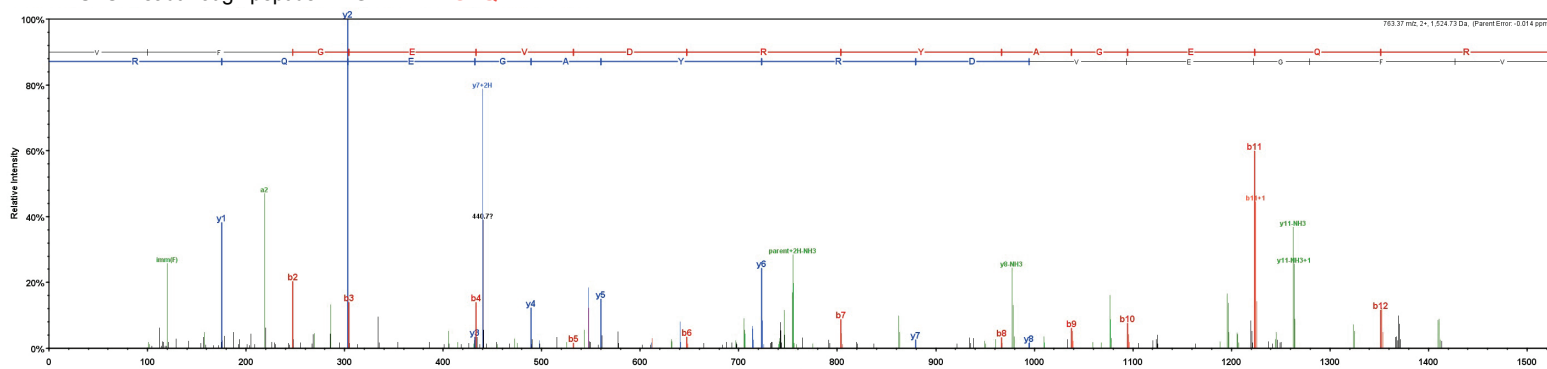**d**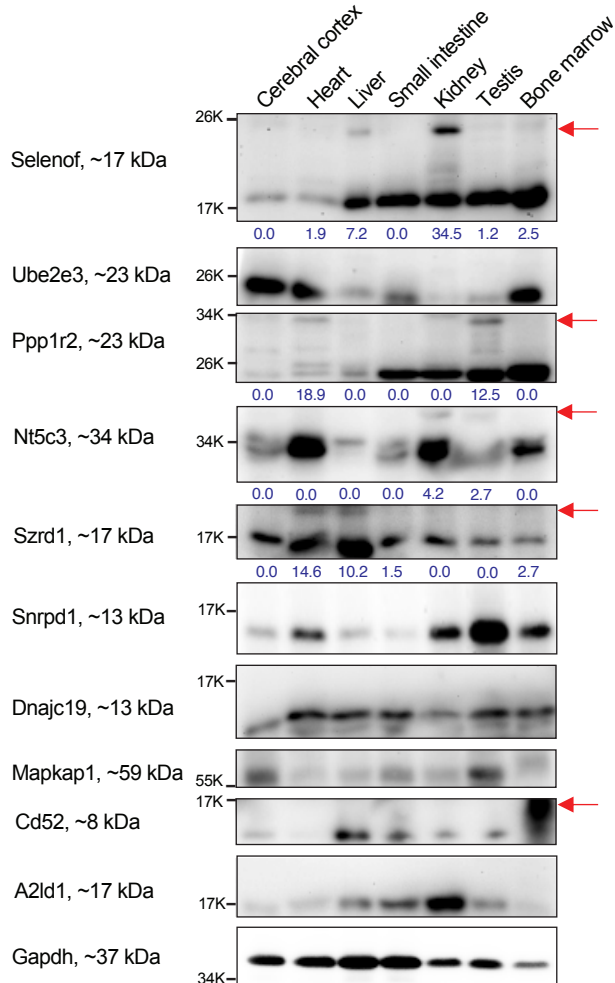**e**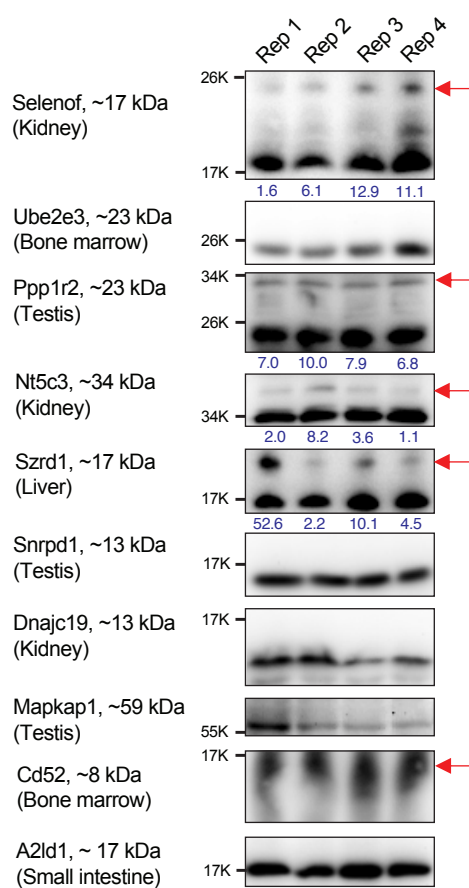

**Supplementary Fig. 8 |  $\Psi$  promotes the stop codon read-through in HeLa cells and mouse tissues.** **a**, The presence of  $\Psi$  within stop codons can convert stop codons into sense codons and promote read-through. **b**, Mass spectrometry captured the read-through peptide fragment across the NDUFS2 stop codon in HeLa cells. **c**, NDUFS2 read-through peptide (red part in the upper panel) was detected by mass spectrometry. **d**, The stop codon read-through for 10 selected proteins, by immunoblotting (IB) to test them in seven different mouse tissues. **e**, The band shifts in four different mice repeats. Some individual variations were observed for *Selenof*, *Ppp1r2*, *Nt5c3*, and *Szrd1*. For **d-e**, the percentage numbers of read-through ratio are shown; the readthrough protein bands are labeled by red arrows.
