# Supplementary material for: Quantitative sequencing using BID-seq uncovers abundant pseudouridines in mammalian mRNA at base resolution
Source: PubMed Central journal article supplement (PMC10017504; doi:10.1038/s41587-022-01505-w), 2022-10-27

# Supplementary Fig. 8d and 8e

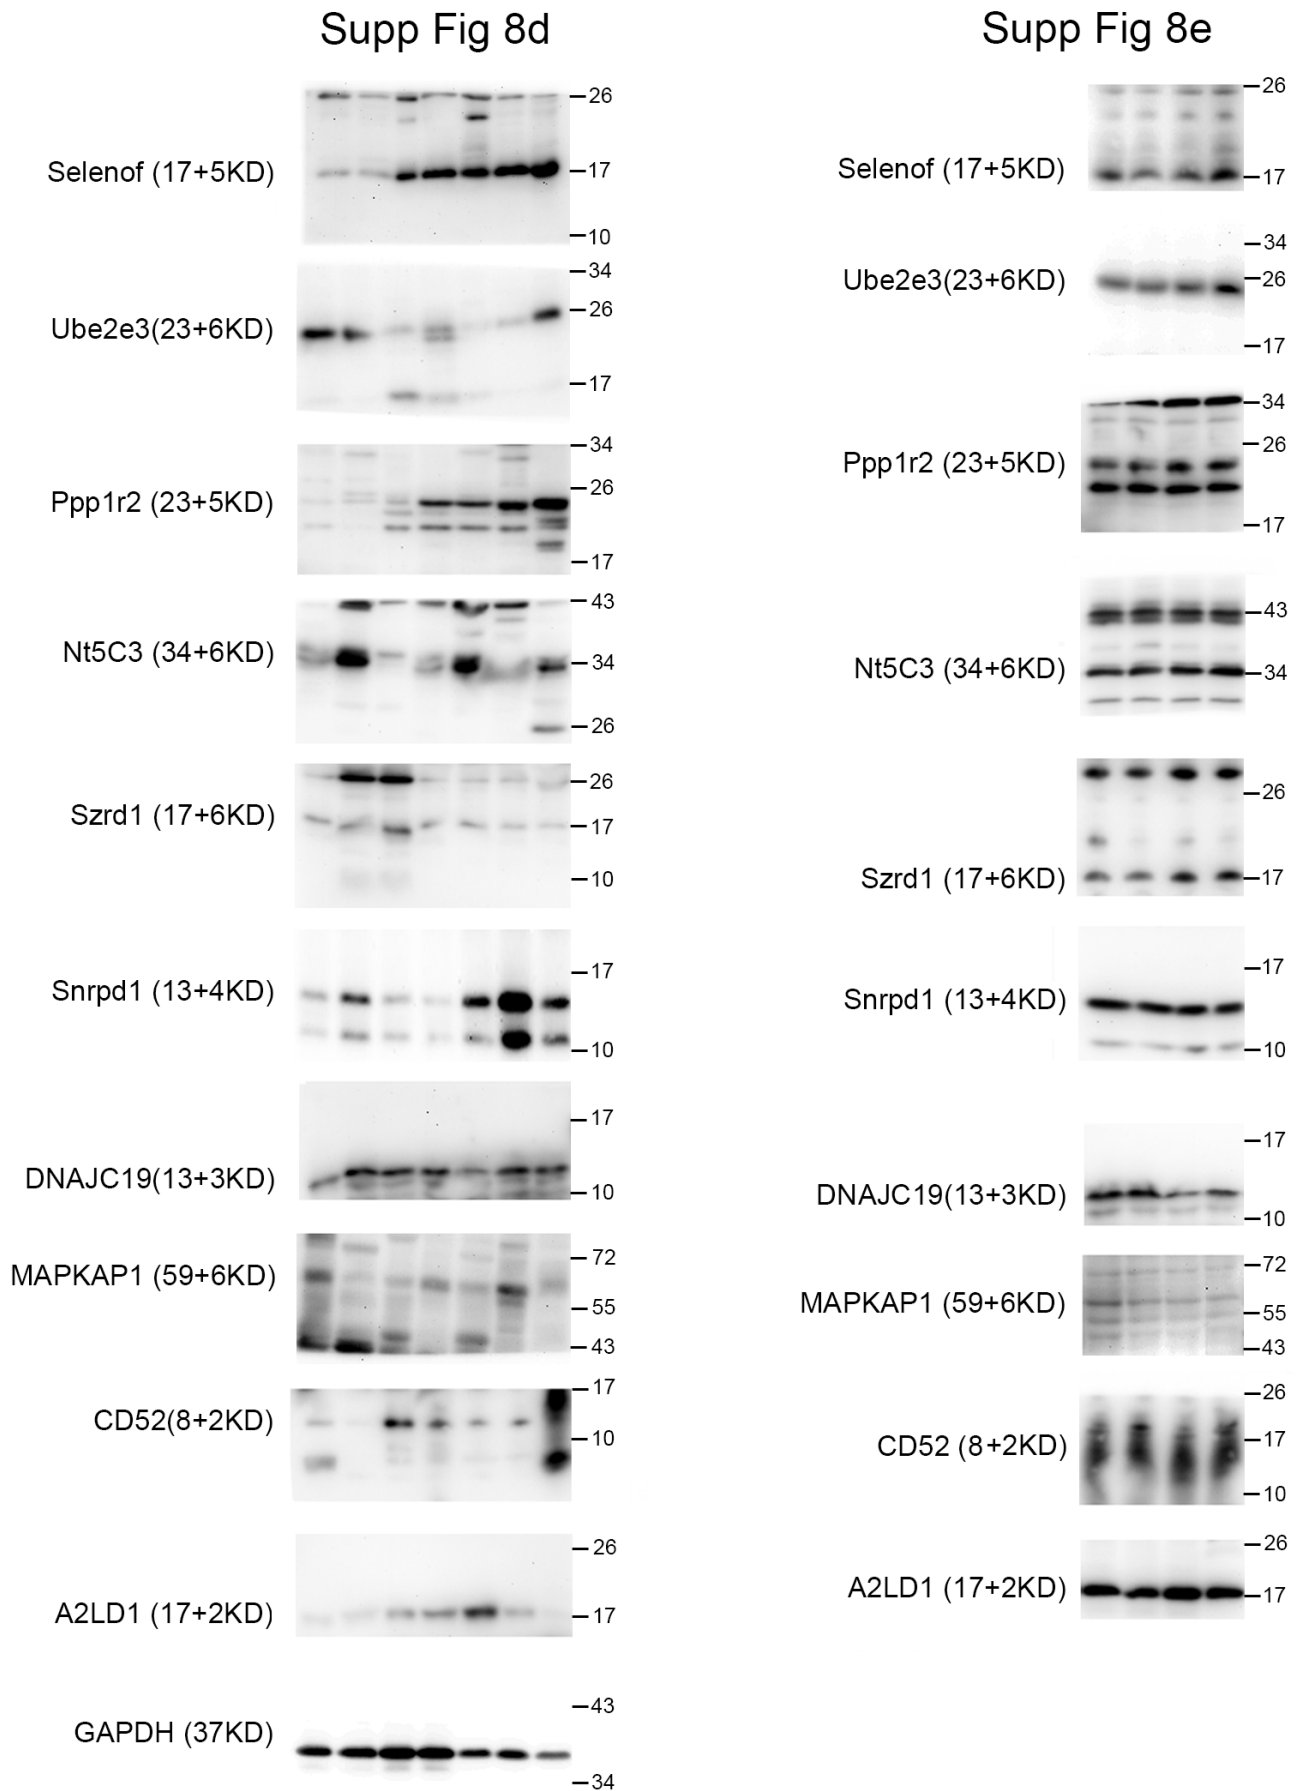

Supplement: 41587_2022_1505_MOESM5_ESM.pdf [file 41587_2022_1505_MOESM5_ESM.pdf]
